# Supplementary material
Source: publisher site journal article supplement (https://www.spandidos-publications.com/5800/downloadSupplementary)
Supplement: Supplementary file 1 [file downloadSupplementary]

## Sheet: Sheet1
Table SVI. a total of 16 genes with high connectivity in the clinical significant module
Gene	Module	MM_R	MM_pvalue	GS_R	GS_pvalue
C1orf135	royalblue	0.805232	2.76063e-23	-0.275216	0.00636577
C9orf100	royalblue	0.810873	7.87347e-24	-0.287974	0.00423237
CDC20	royalblue	0.872388	2.74496e-31	-0.25927	0.0103348
CDC25C	royalblue	0.836719	1.3929e-26	-0.327411	0.0010621
CDCA2	royalblue	0.827274	1.59375e-25	-0.391095	7.46745e-05
CENPF	royalblue	0.824378	3.26701e-25	-0.25425	0.011969
CSE1L	royalblue	0.821148	7.16543e-25	-0.317928	0.00150667
FOXM1	royalblue	0.803399	4.11354e-23	-0.364816	0.000238871
NCAPG	royalblue	0.889161	5.0991e-34	-0.223538	0.0277374
KIF20A	royalblue	0.814297	3.60131e-24	-0.27087	0.00728479
KIF2C	royalblue	0.823622	3.93239e-25	-0.26341	0.0091375
MCM10	royalblue	0.811568	6.72577e-24	-0.201611	0.0476714
POLQ	royalblue	0.805801	2.43696e-23	-0.244725	0.0156976
PRC1	royalblue	0.833698	3.08798e-26	-0.299485	0.0028819
SGOL1	royalblue	0.859746	1.79271e-29	-0.209684	0.0392698
TTK	royalblue	0.916703	1.25941e-39	-0.226331	0.0257994
